# Supplementary material for: Ancient exapted transposable elements promote nuclear enrichment of human long noncoding RNAs
Source: PubMed Central journal article supplement (PMC6360812; doi:10.1101/gr.229922.117), 2019-02

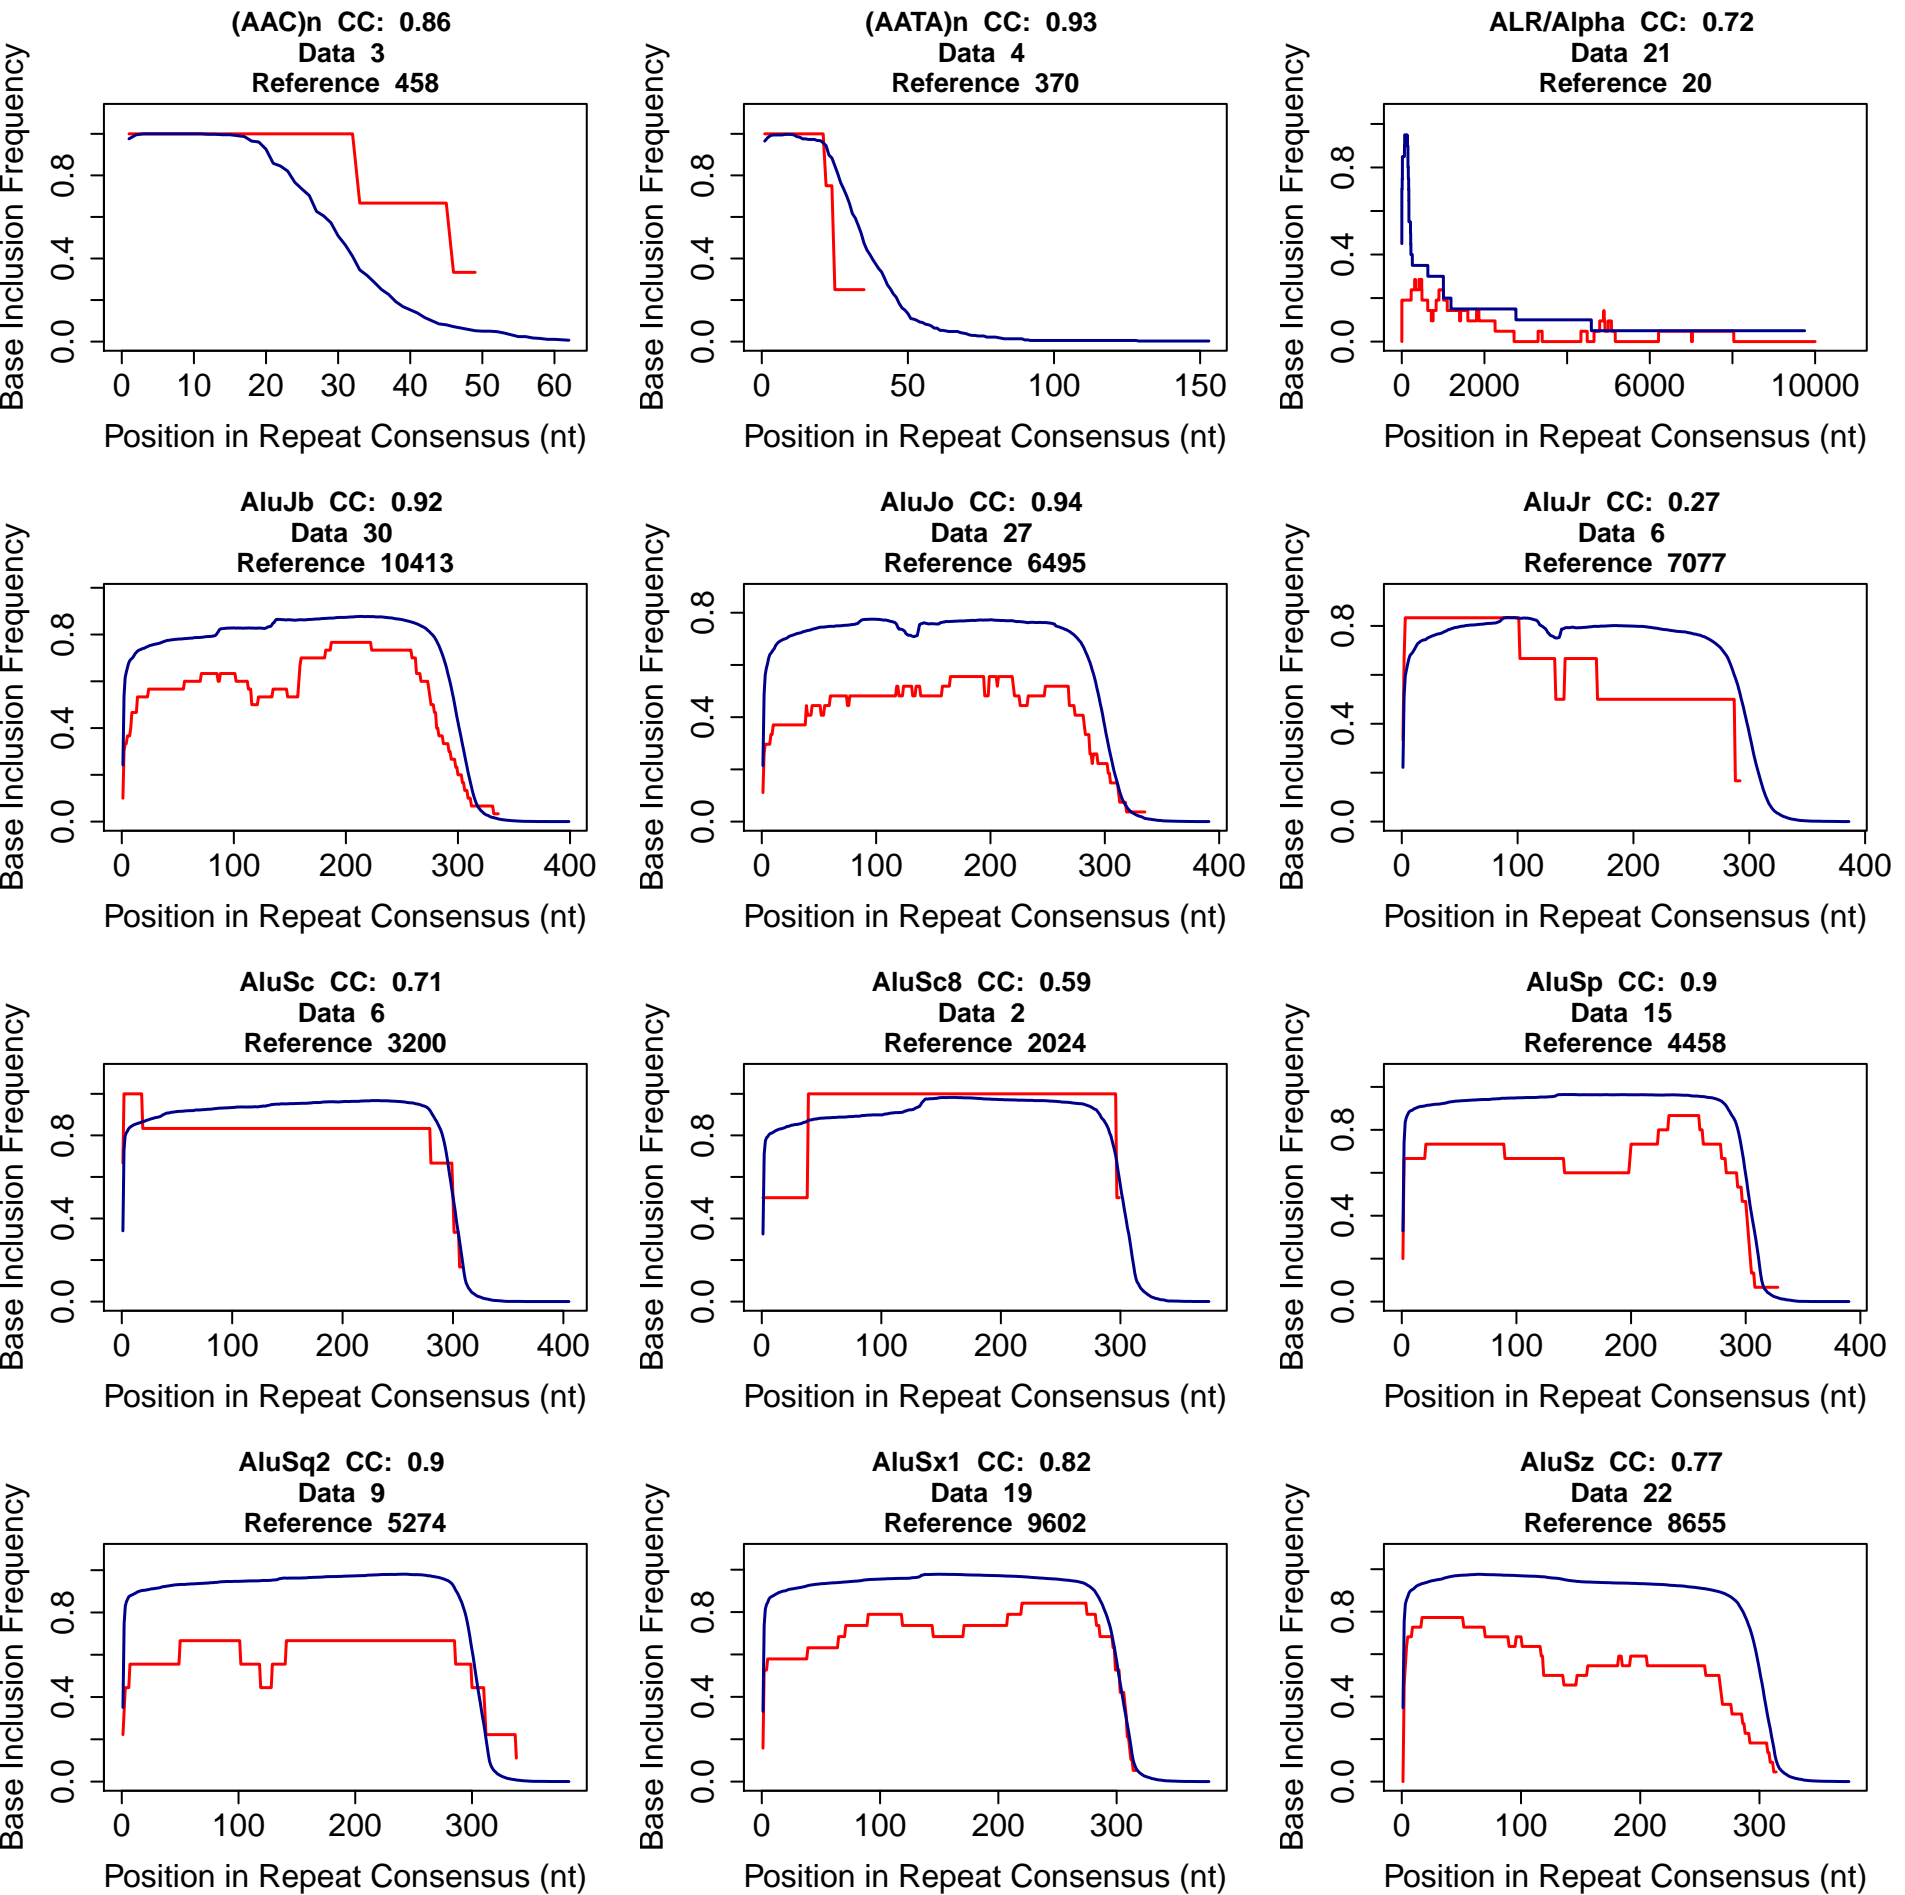

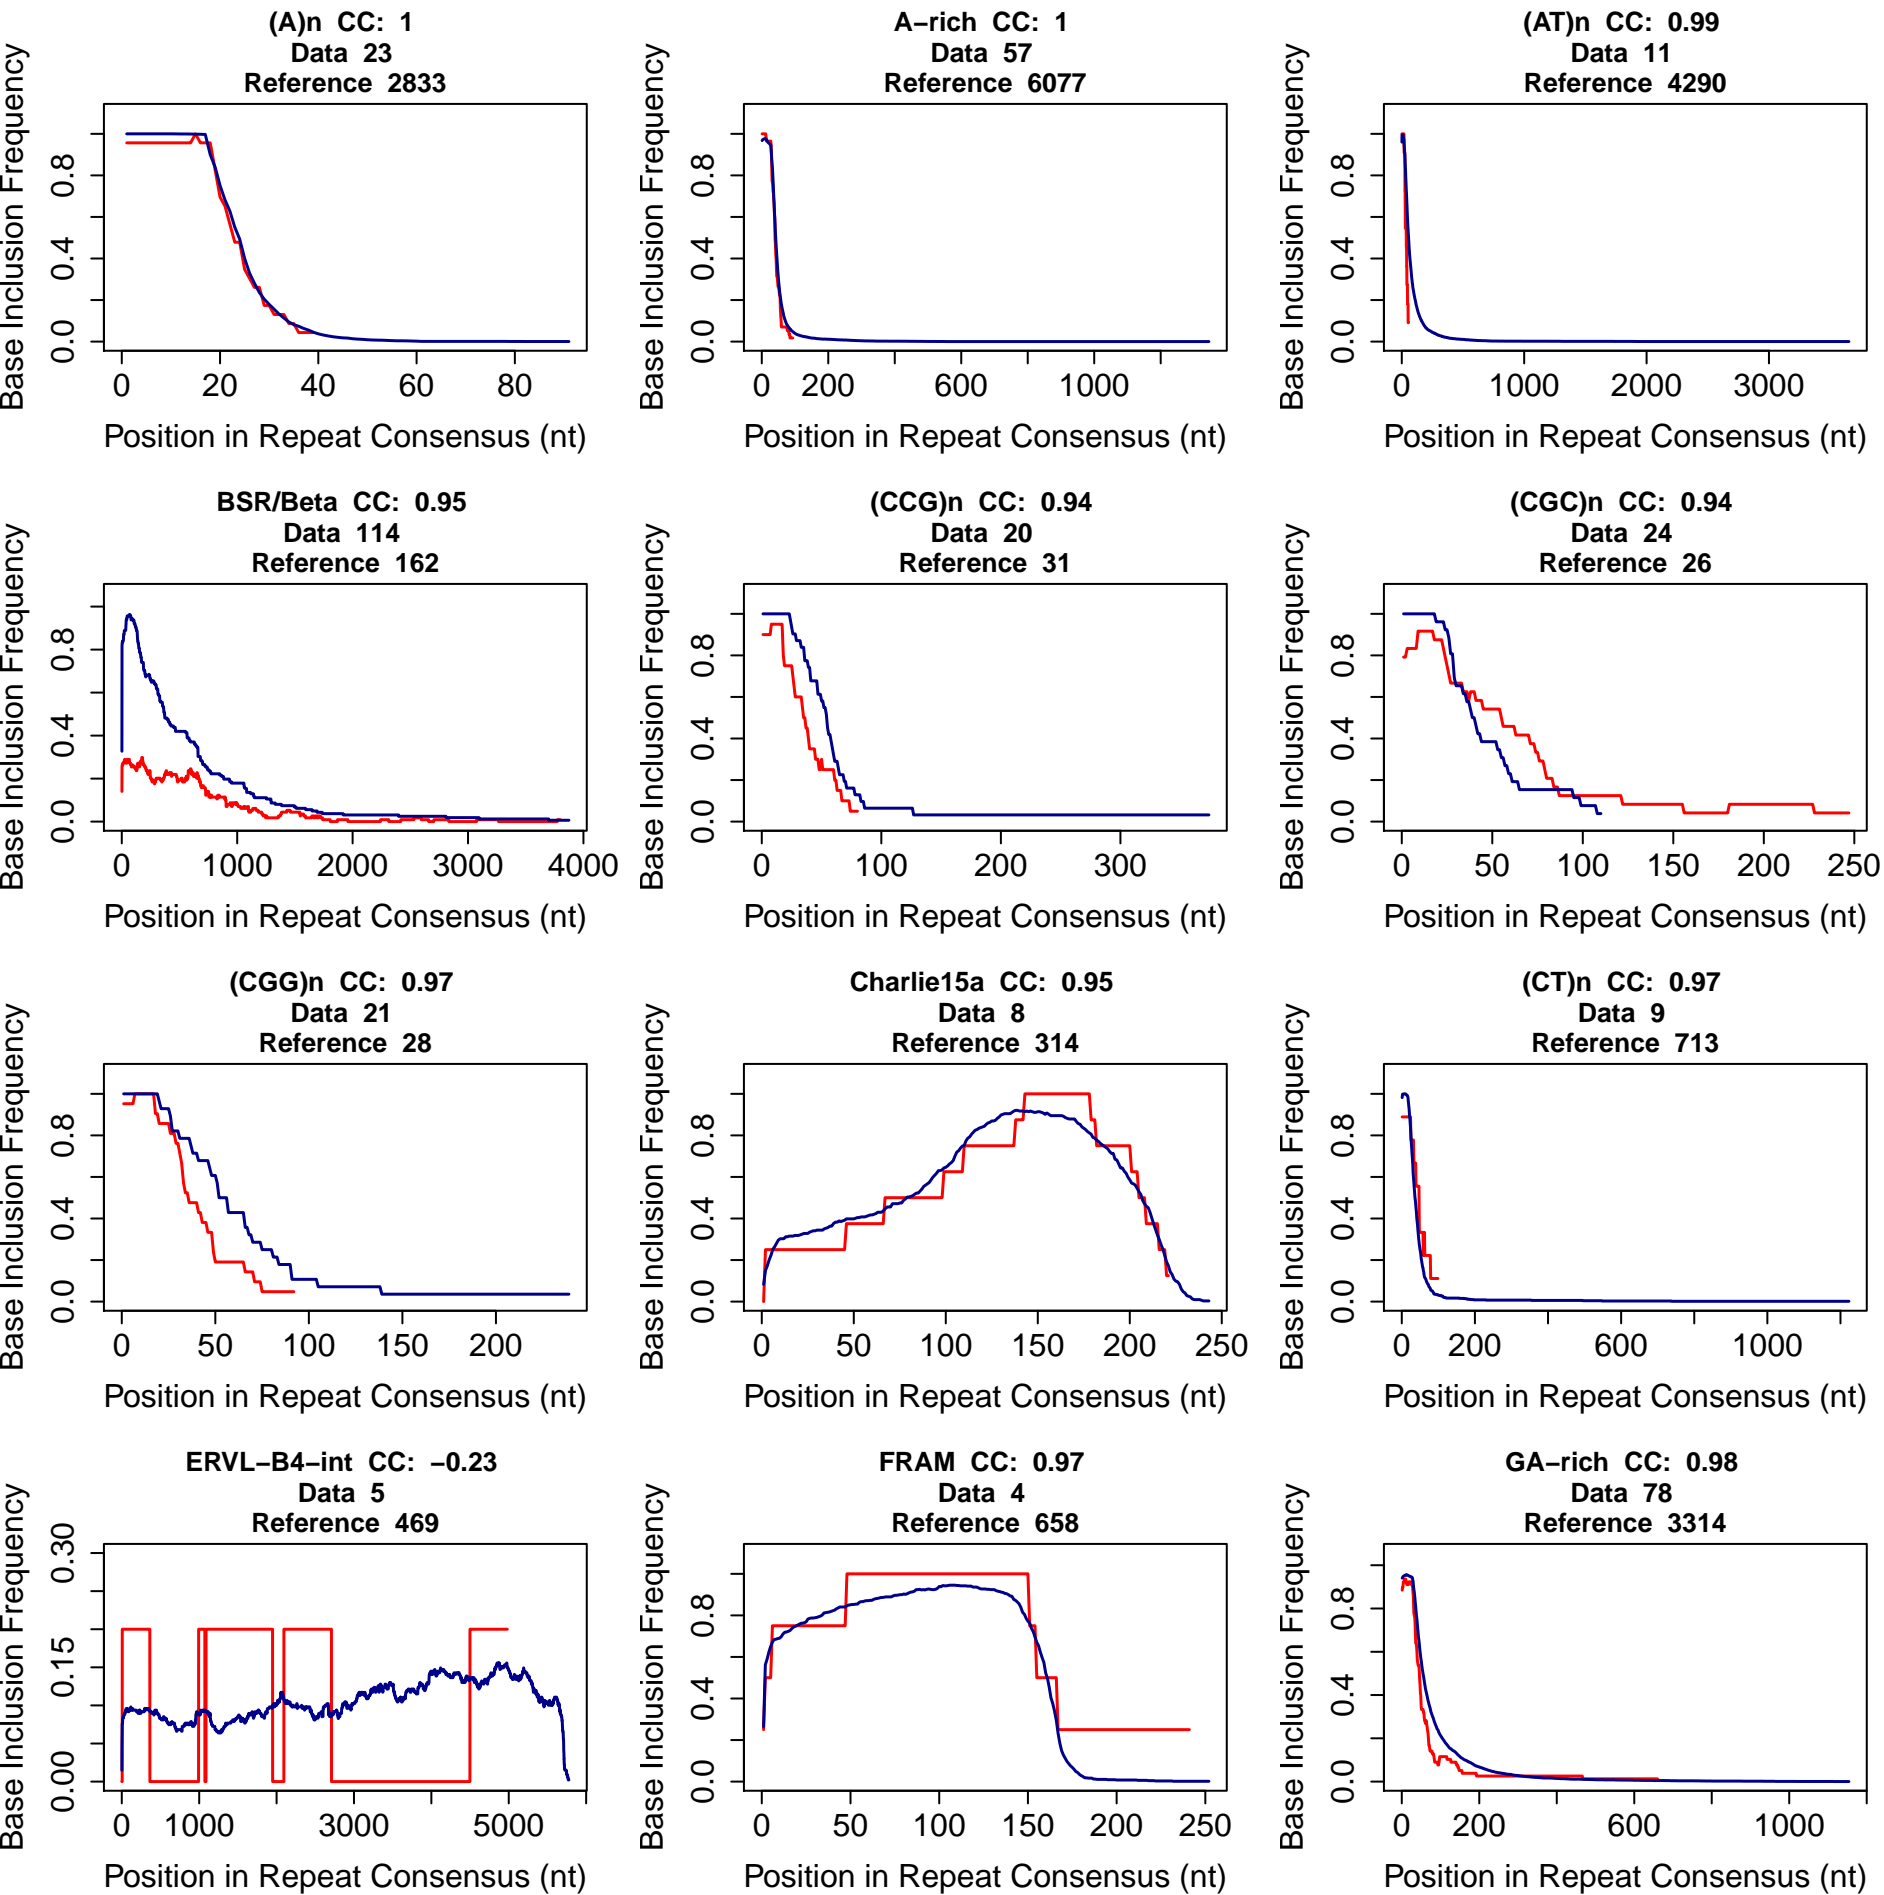

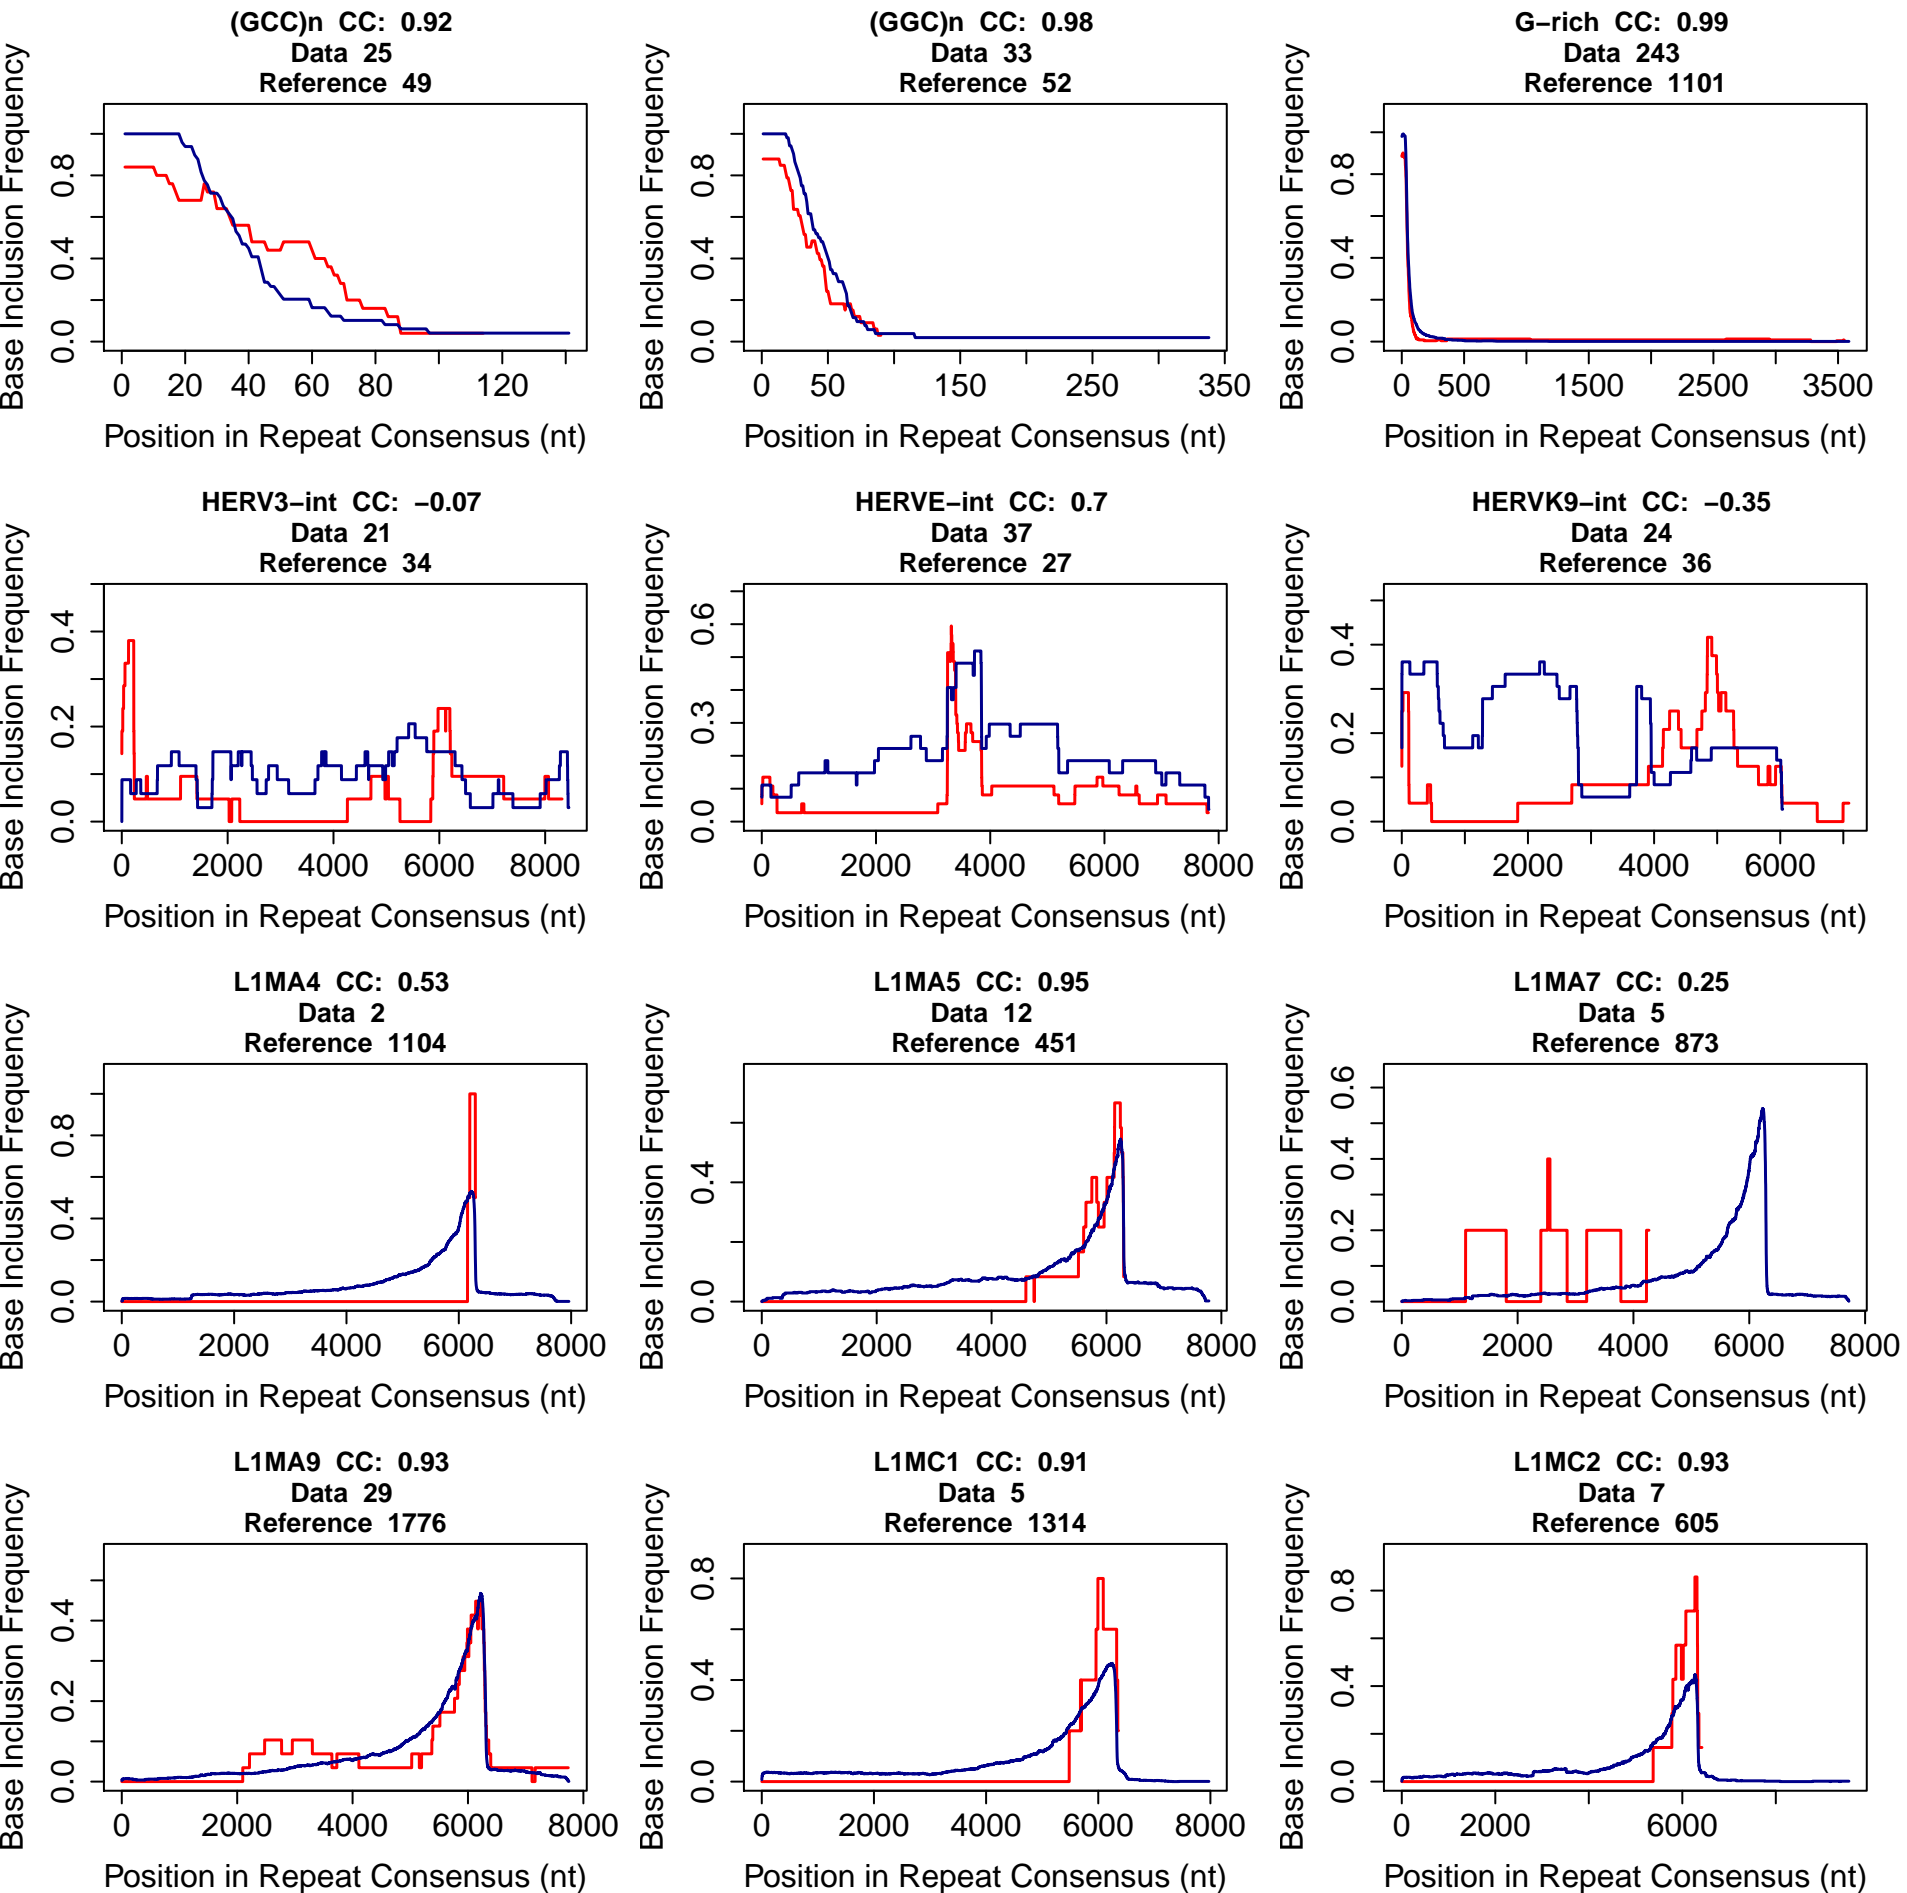

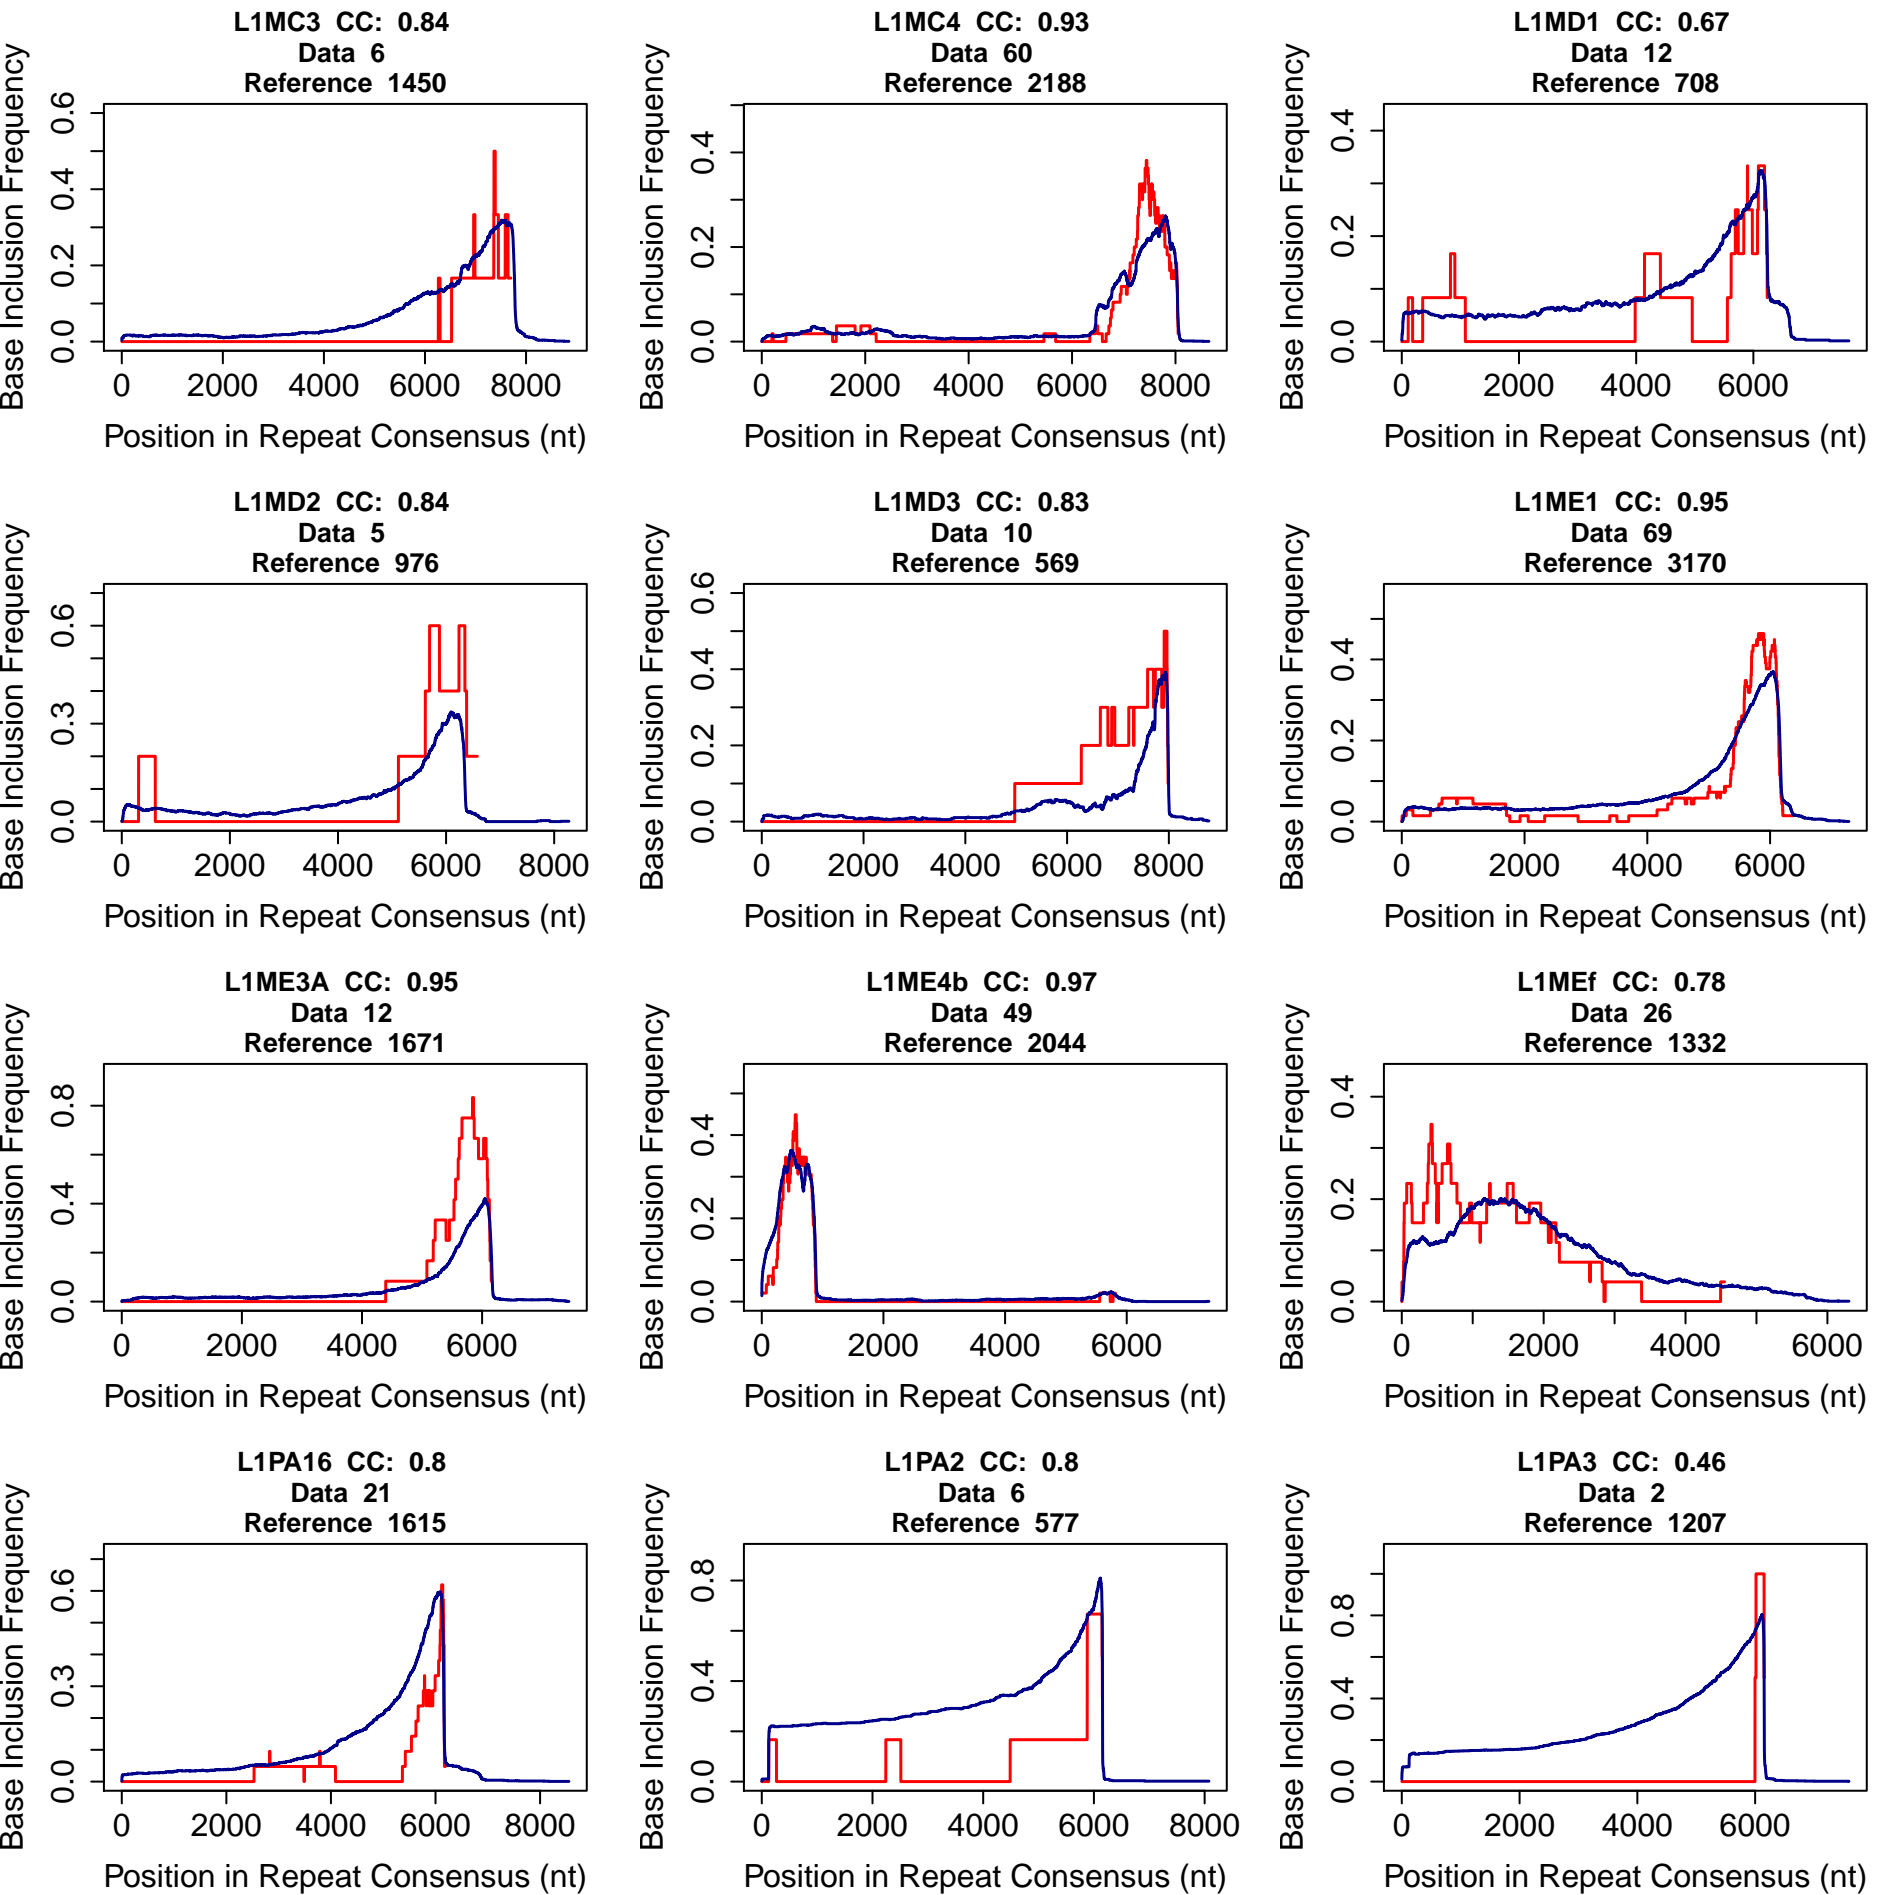

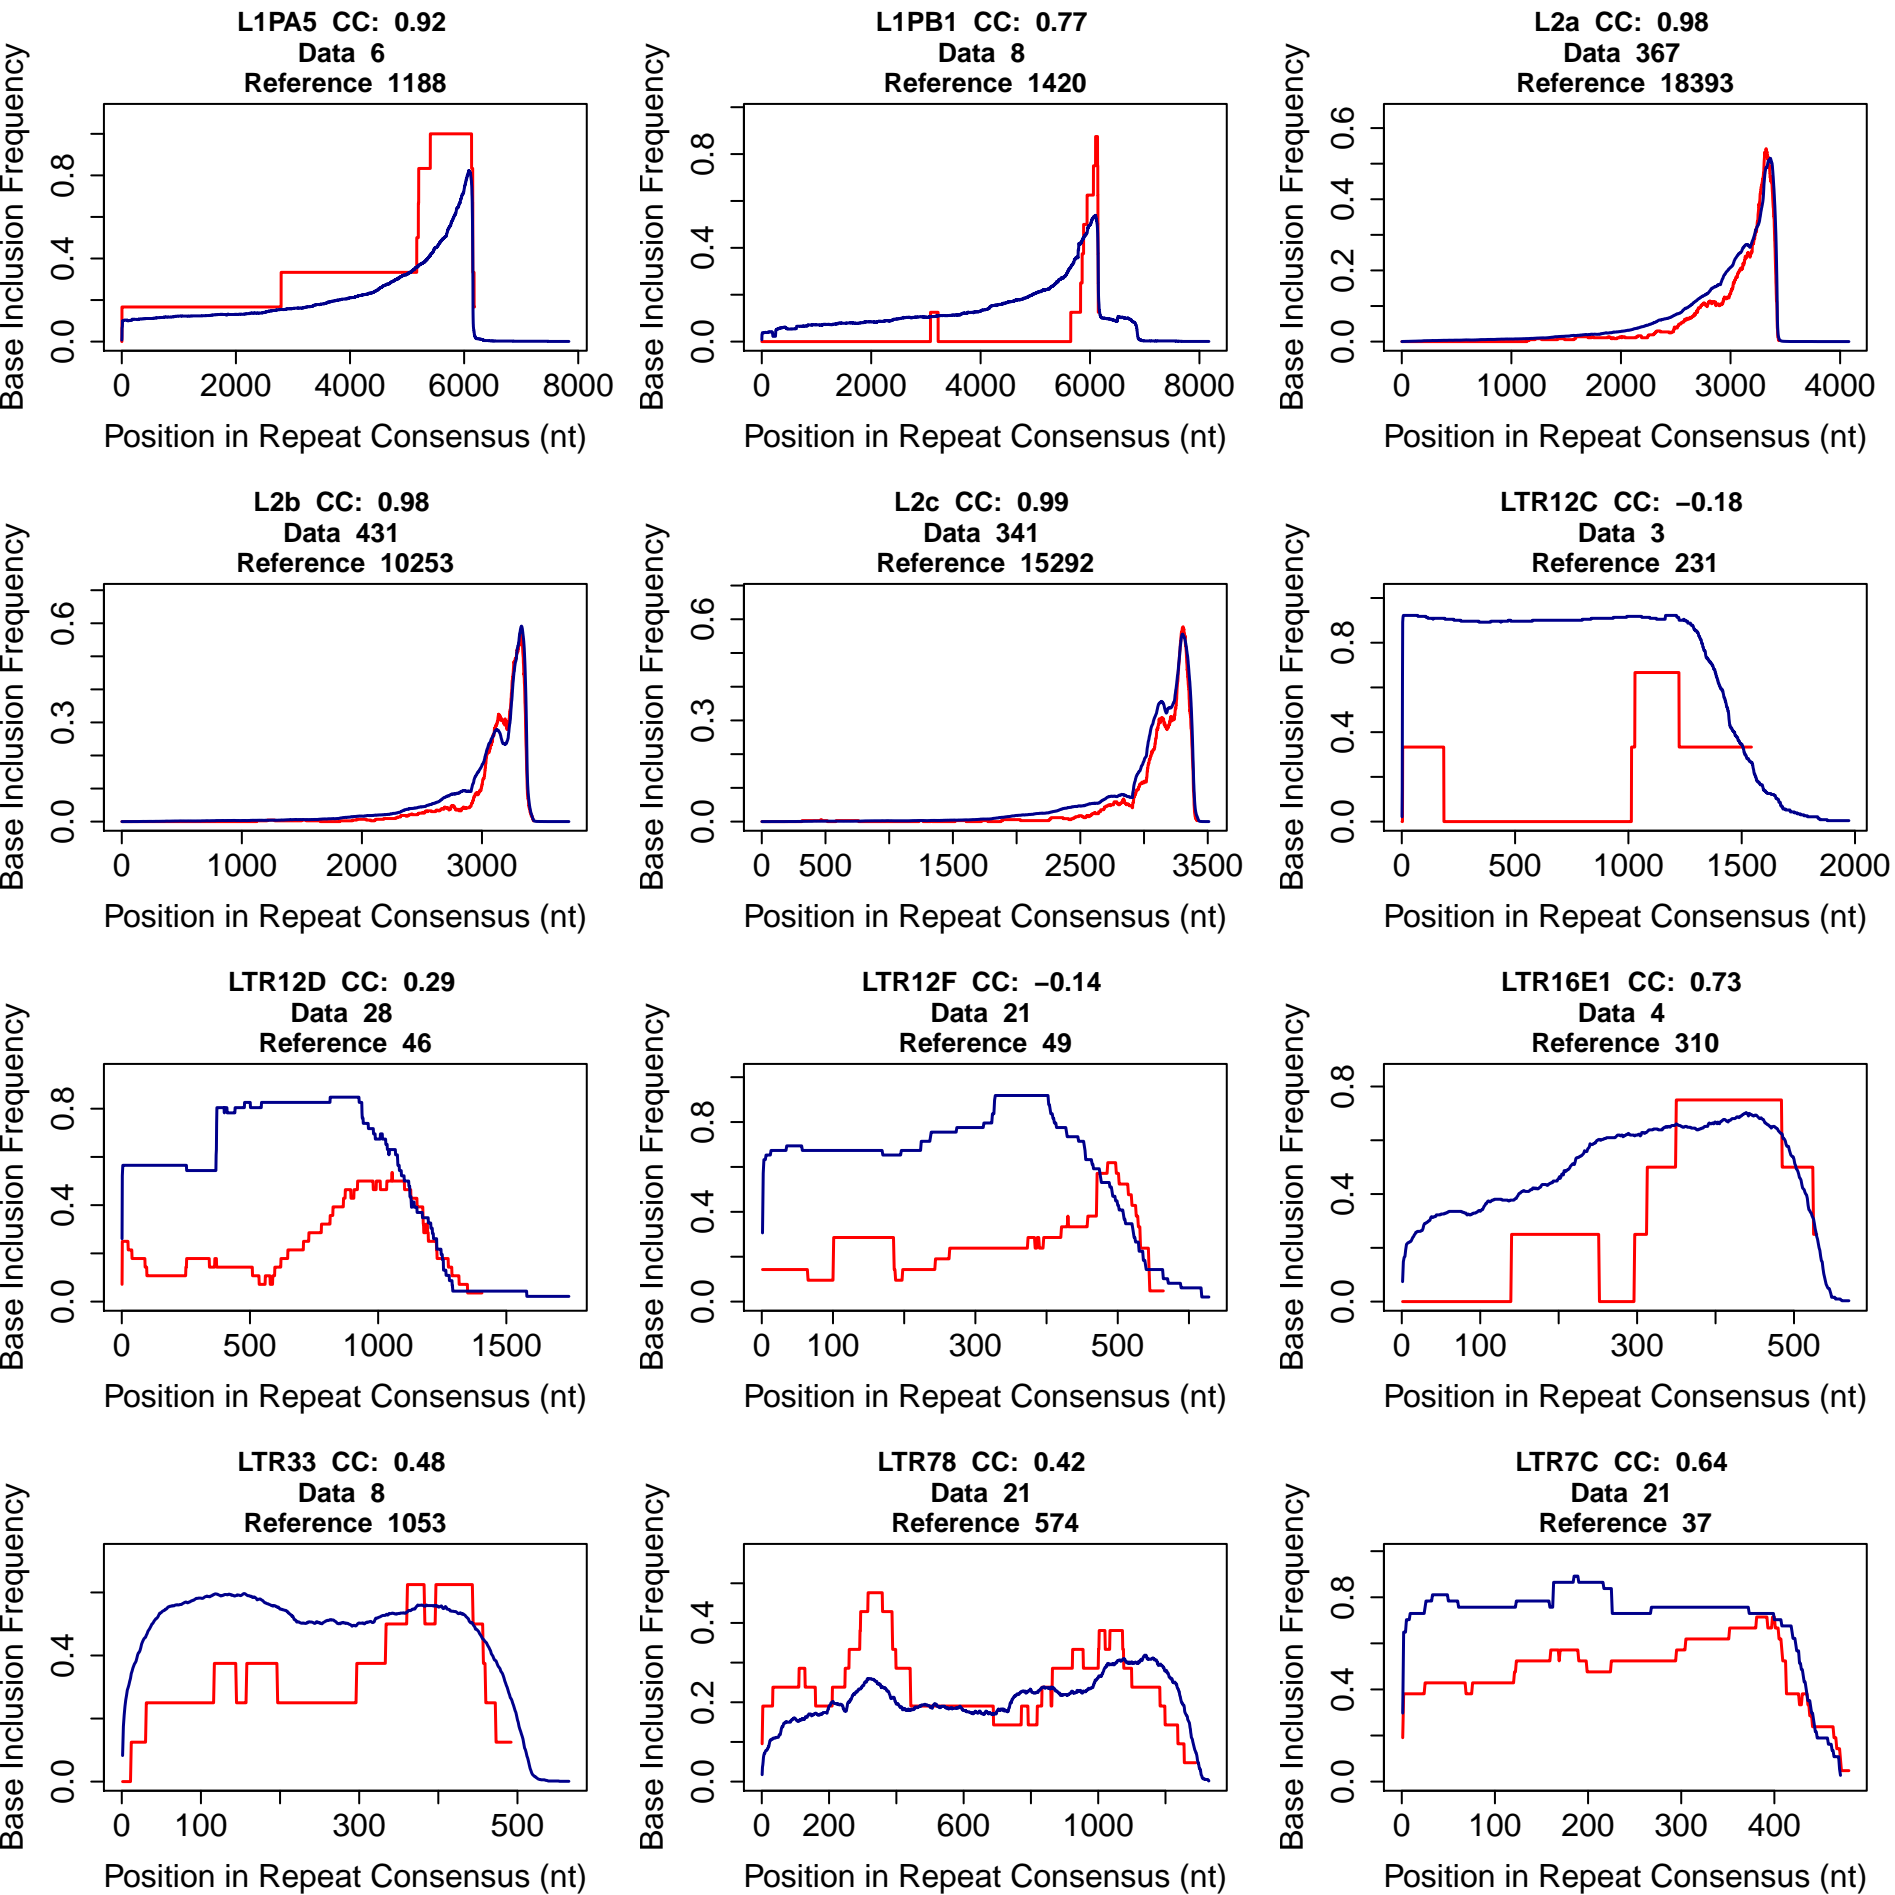

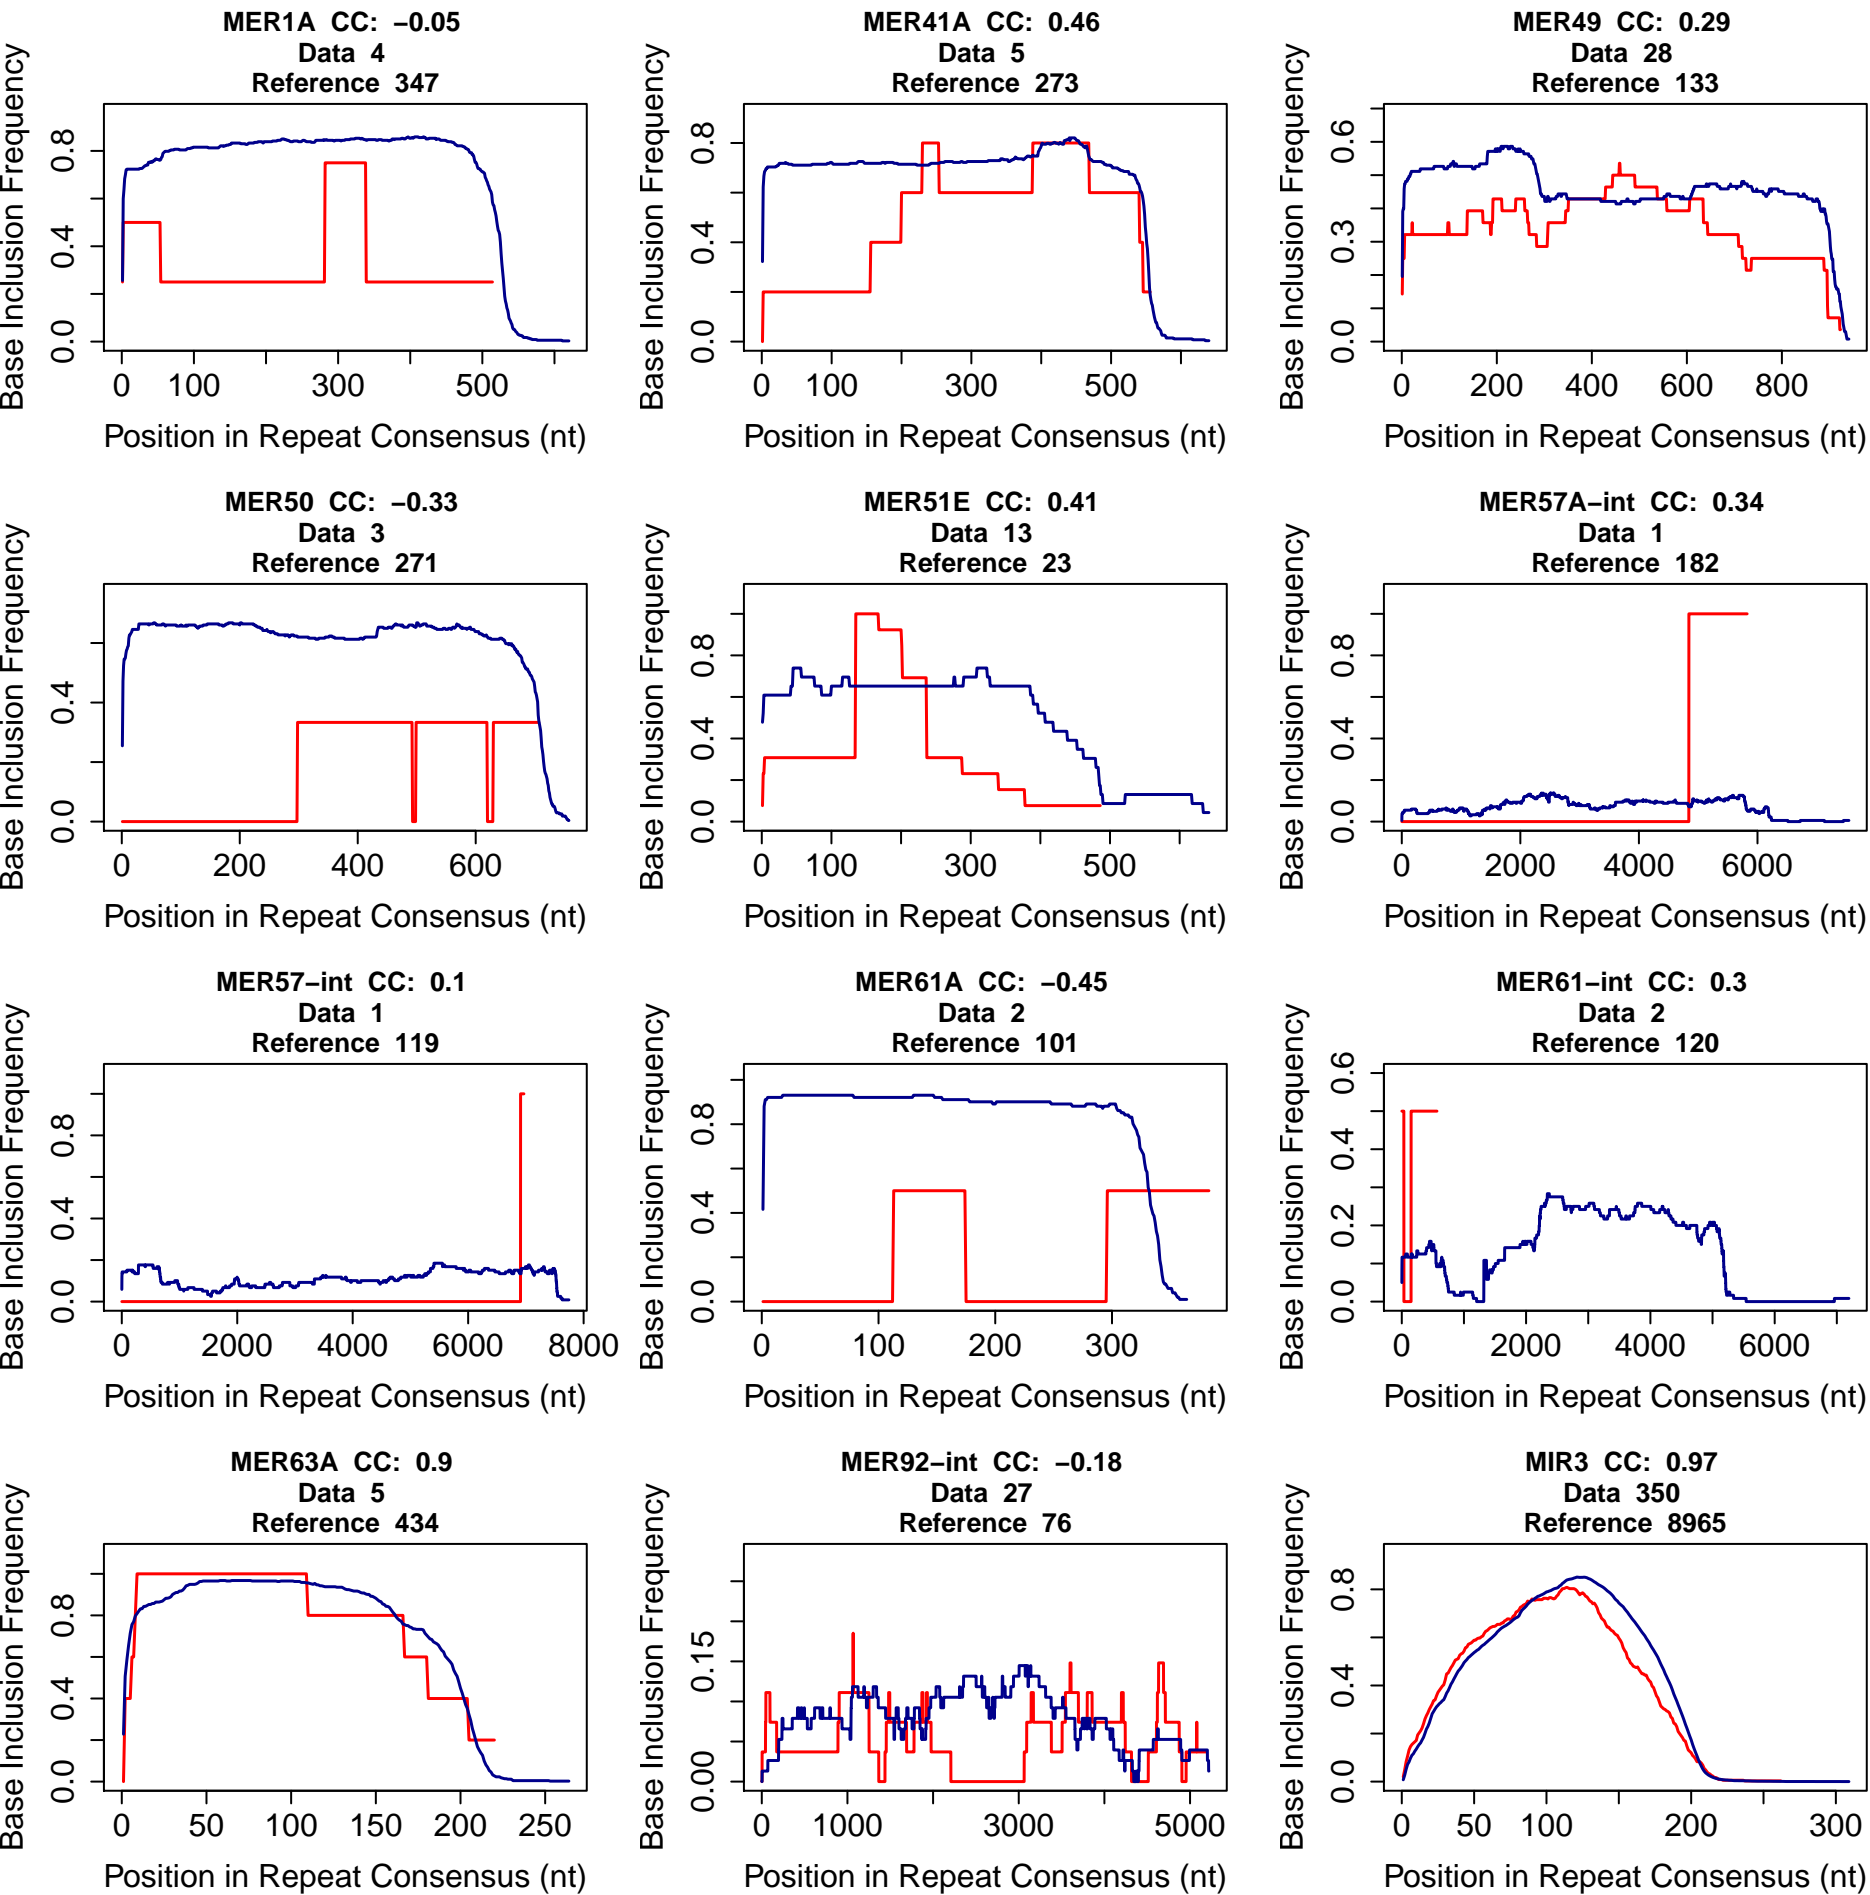

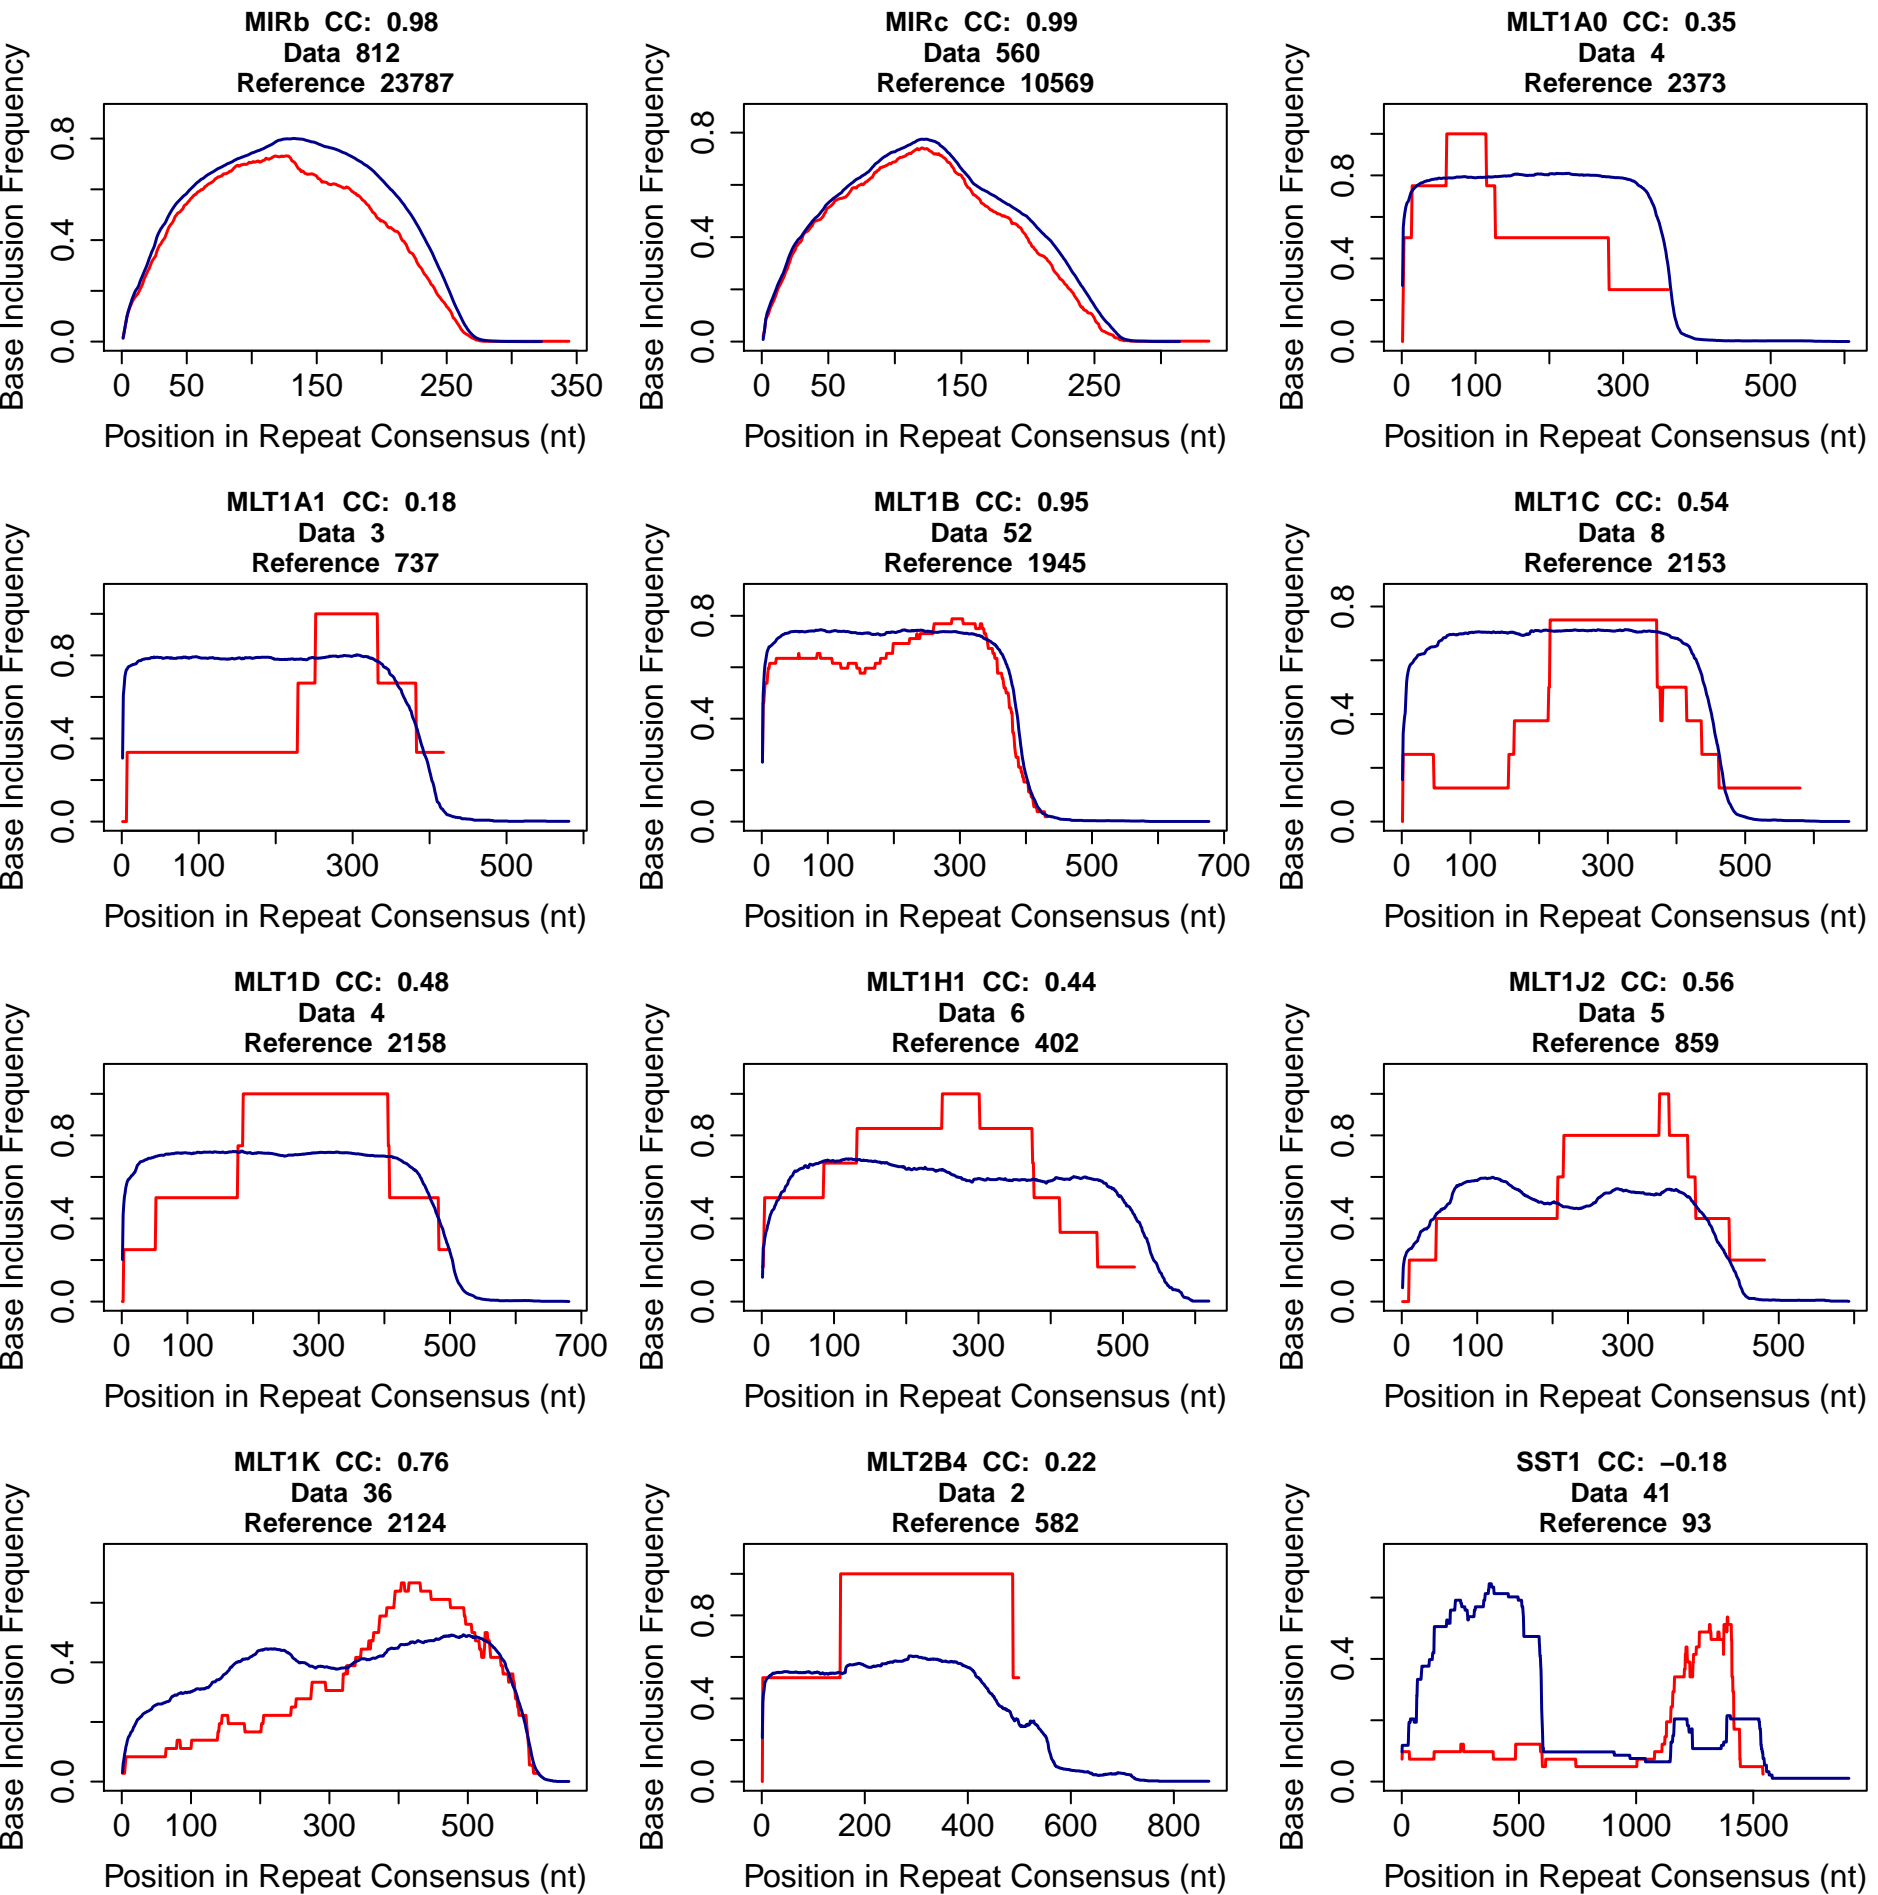

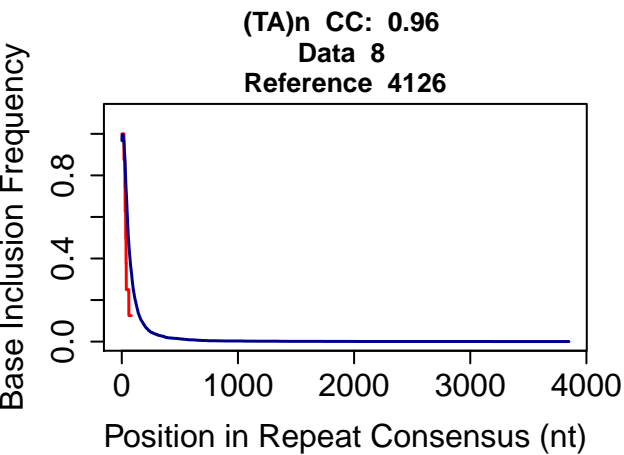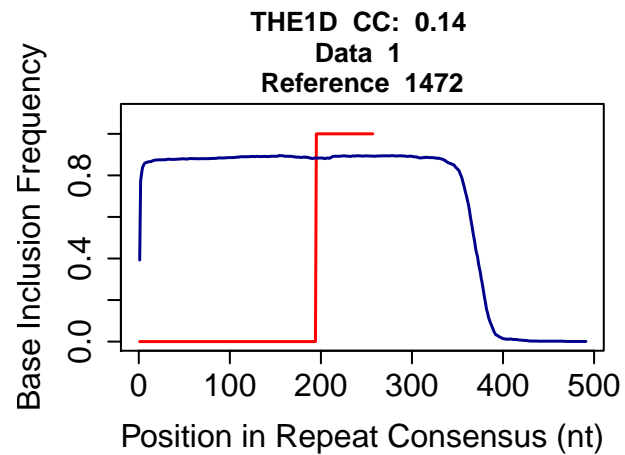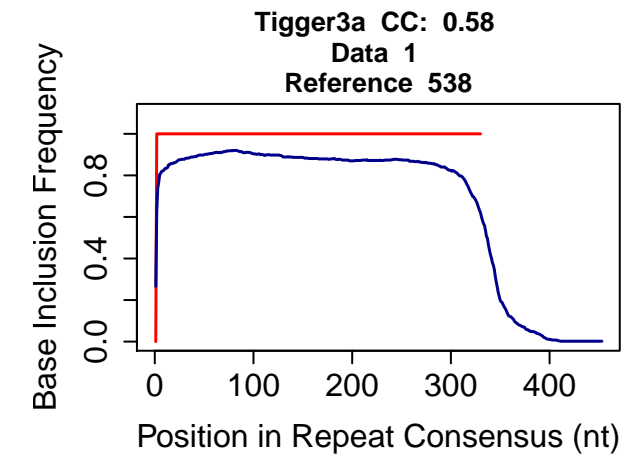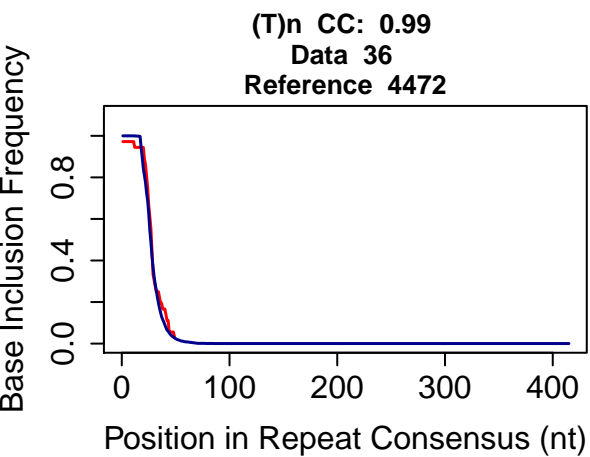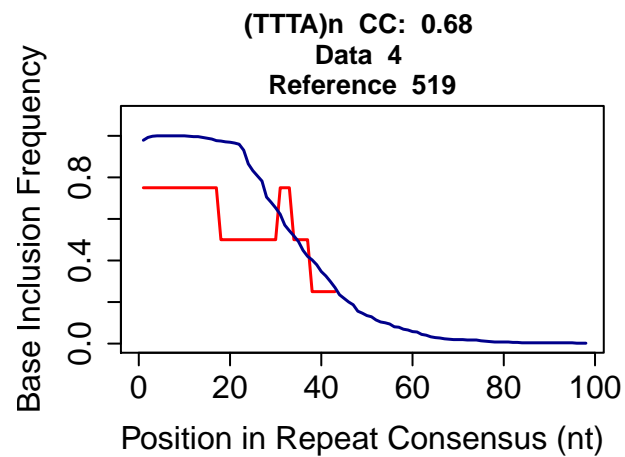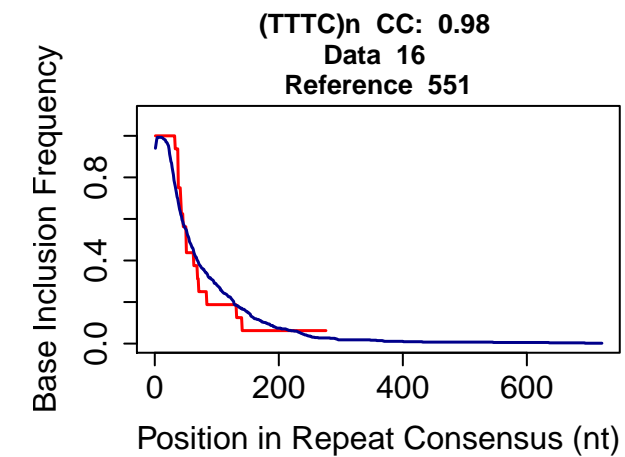

Supplement: supp_gr.229922.117_Supplemental_File_S2.pdf [file supp_gr.229922.117_Supplemental_File_S2.pdf]
